# Supplementary material for: Cytotoxic and genotoxic assessment of glycolipid-reduced and -capped gold and silver nanoparticles
Source: Royal Society of Chemistry journal article supplement (doi:10.1039/b9nj00277d), 2009-11-24
Supplement: b9nj00277d.pdf [file b9nj00277d.pdf]

## Supporting Information

### Cytotoxic and Genotoxic Assessment of Glycolipid Reduced Gold and Silver Nanoparticles

Sanjay Singh,<sup>1‡</sup> V. D'Britto,<sup>1</sup> A. A. Prabhune,<sup>2</sup> C. V. Ramana, Alok Dhawan<sup>3\*</sup>  
and B. L. V. Prasad<sup>1\*</sup>

<sup>1</sup>Materials Chemistry Division, National Chemical Laboratory, Pune-411 008, India.

<sup>2</sup>Division of Biochemical Sciences, National Chemical Laboratory, Pune-411008, India

<sup>3</sup>Developmental Toxicology Division, Indian Institute of Toxicology Research, Lucknow-  
226001, India.

E-mail: dhawanalok@hotmail.com, [pl.bhagavatula@ncl.res.in](mailto:pl.bhagavatula@ncl.res.in)

Tel: +91 20 25902013 Fax: +91 20 25902636

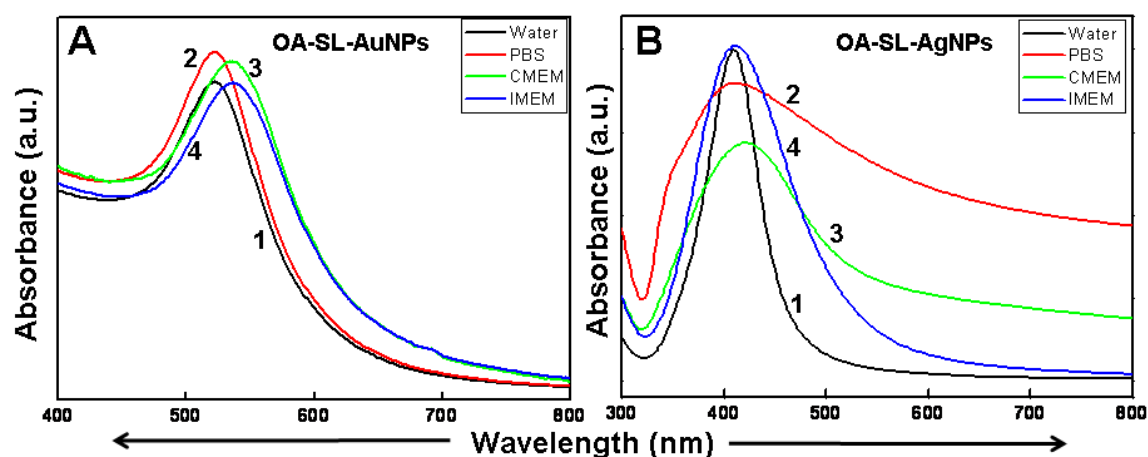

**ESI-1:** UV-vis spectra of OA-SL-AuNPs (A) and OA-SL-AgNPs (B) dispersed in water (curve 1), PBS (curve 2), CMEM (curve 3) and IMEM (curve 4).

<sup>‡</sup> Current address: Department of Molecular Biology and Microbiology, Burnett School of Biomedical Sciences, College of Medicine, University of Central Florida, Orlando, FL 32816.

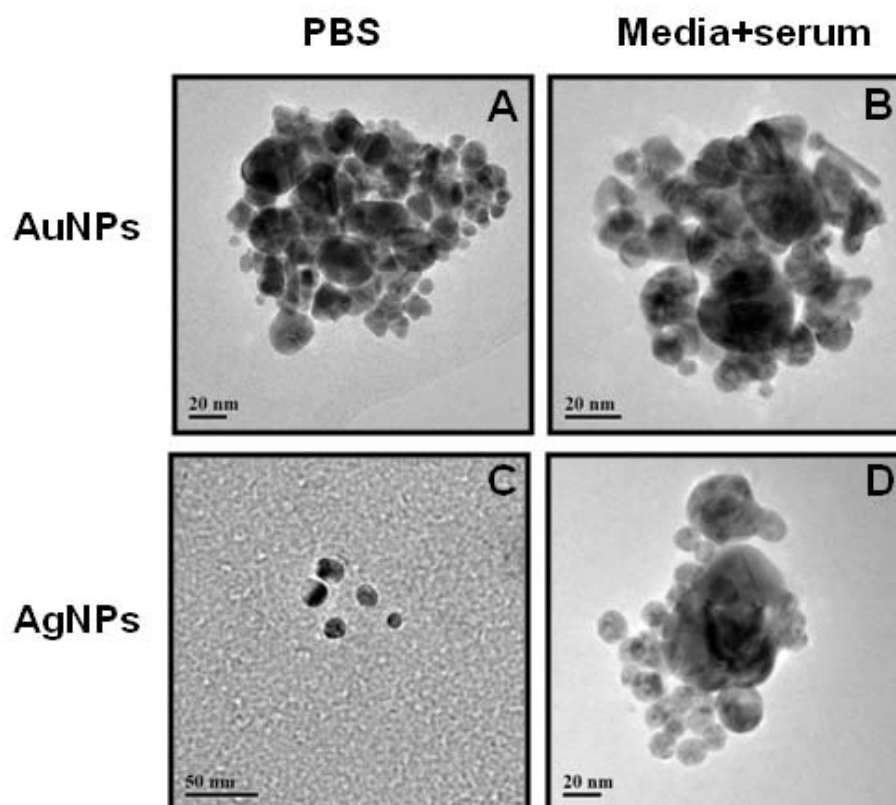

**ESI-2:** TEM images of AuNPs (A, B, C) and AgNPs (D, E, F) in serum containing media, PBS and water.

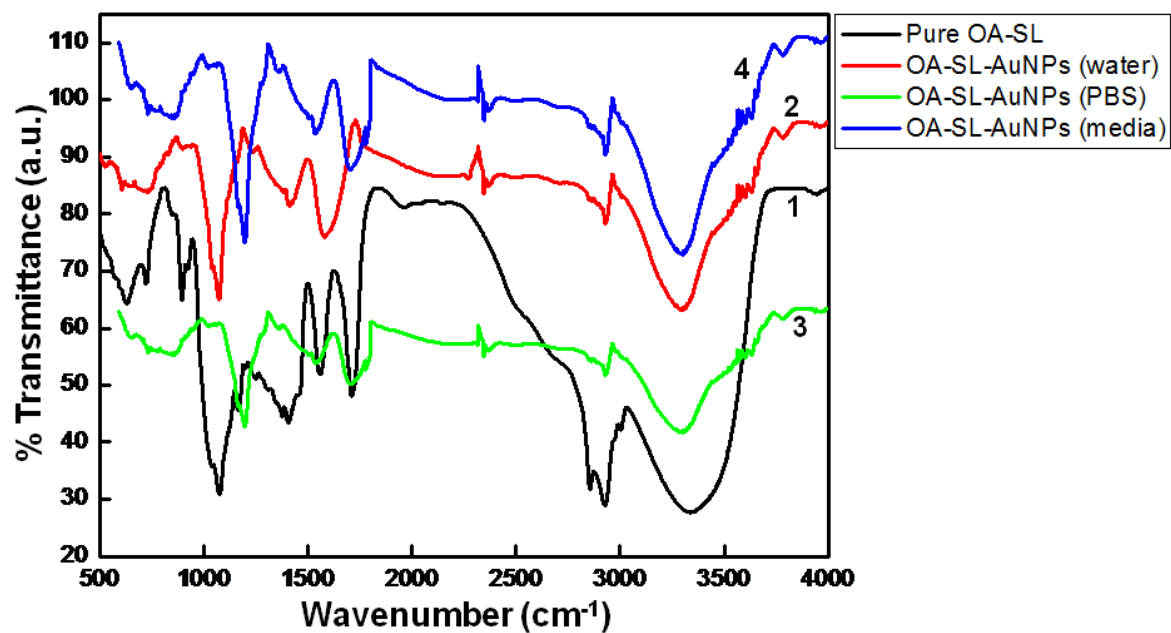

**ESI-3:** FTIR spectra recorded from pure OA-SL (trace 1), OA-SL-AuNPs dispersed in water (trace 2), OA-SL-AuNPs dispersed in PBS (trace 3) and OA-SL-AuNPs dispersed in CMEM media (trace 4)

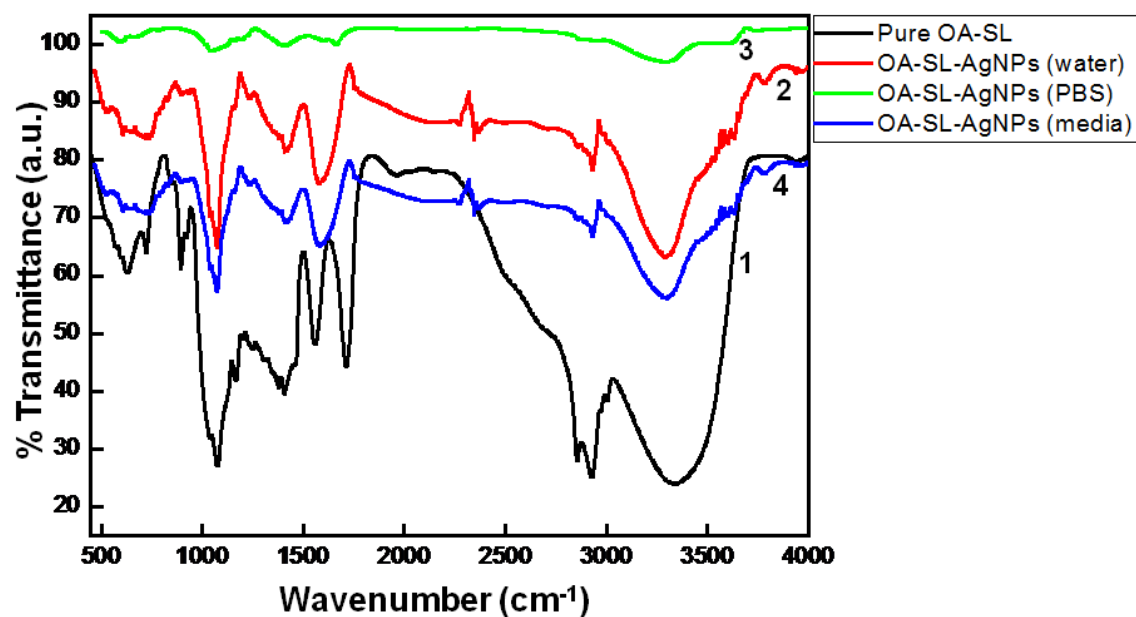

**ESI-4:** FTIR spectra recorded from pure OA-SL (trace 1), OA-SL-AgNPs dispersed in water (trace 2), OA-SL-AgNPs dispersed in PBS (trace 3) and OA-SL-AgNPs dispersed in CMEM media (trace 4)

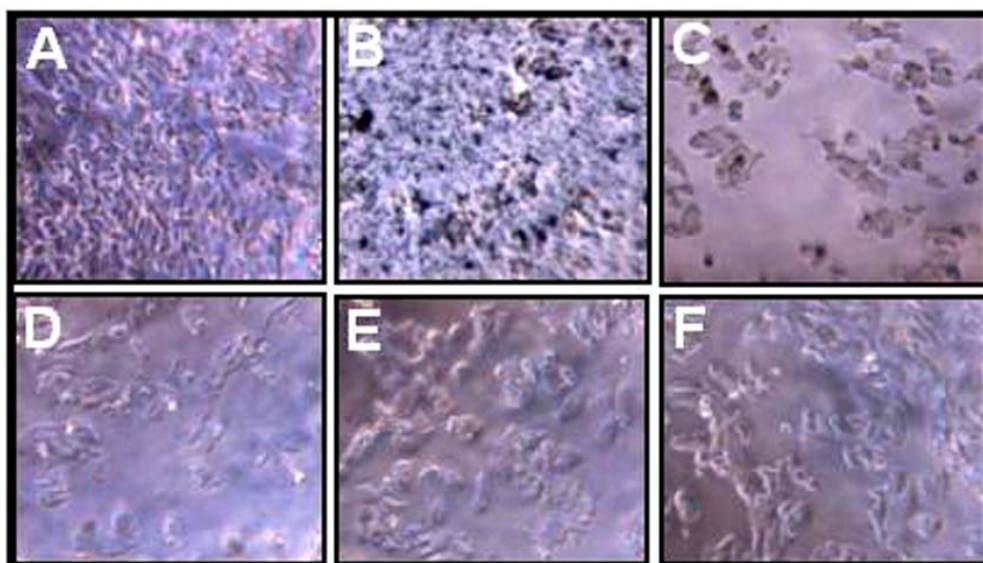

**ESI 5:** Phase contrast images of HepG2 cells (B to F) incubated respectively with 500 µg/mL, 50 µg/mL, 5 µg/mL, 0.5 µg/mL and 0.0005 µg/mL of OA-SL-AuNPs. Figure A shows the morphology of untreated (control) HepG2 cells incubated for 3 h.

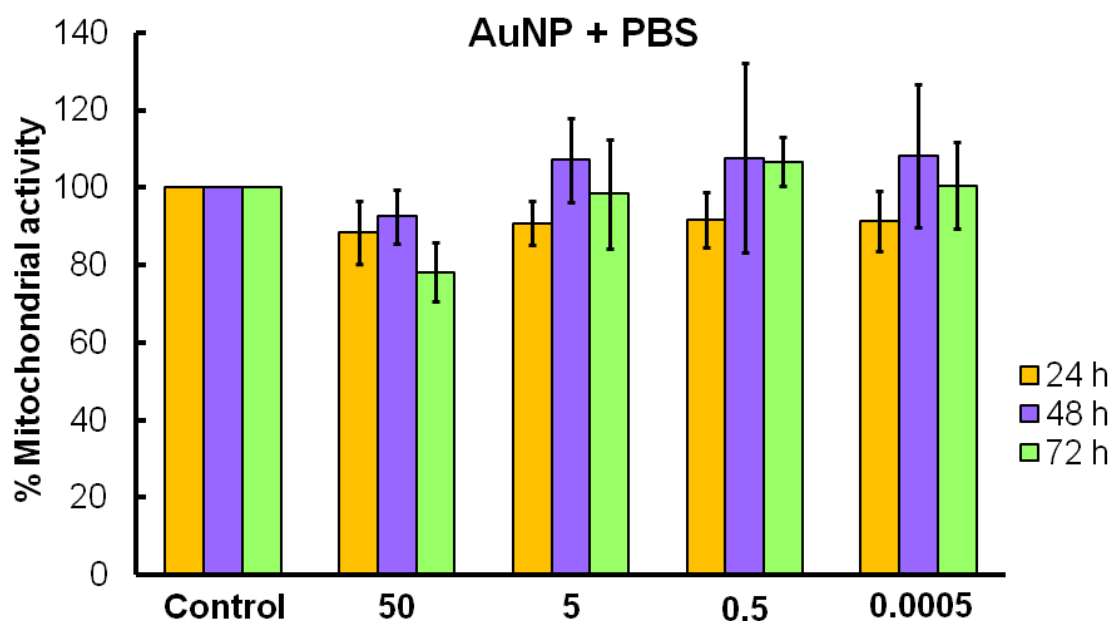

**ESI-6:** Statistical data representing the toxic effect of OA-SL-AuNPs dispersed in PBS incubated with HepG2 cells for 24, 48 and 72 h.

## AuNP + CMEM

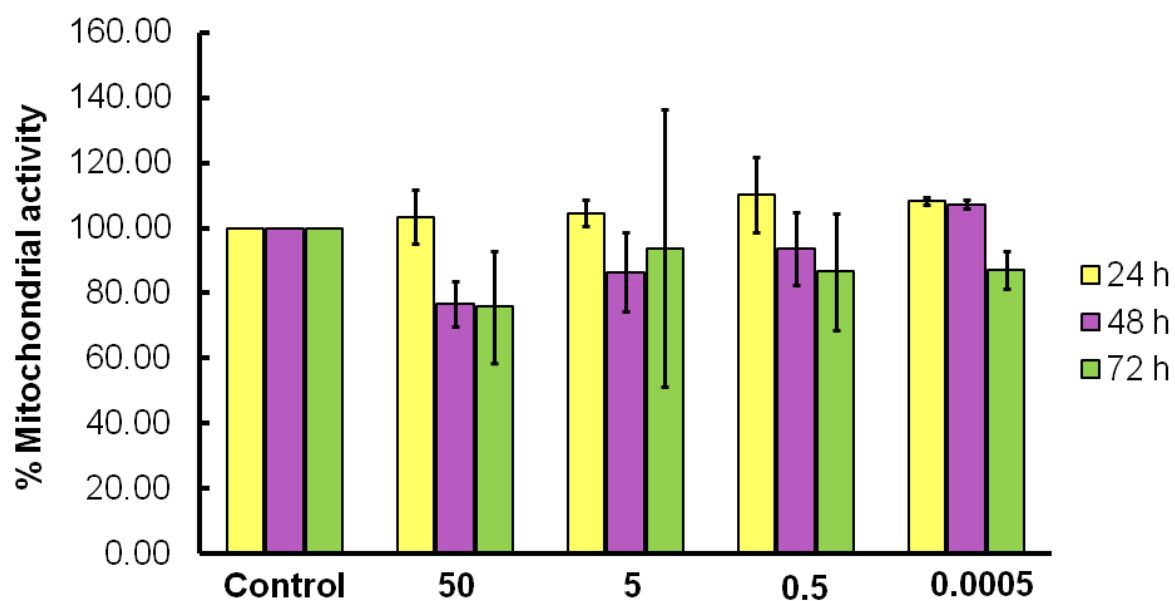

**ESI-7:** Statistical data representing the toxic effect of OA-SL-AuNPs dispersed in CMEM incubated with HepG2 cells for 24, 48 and 72 h.

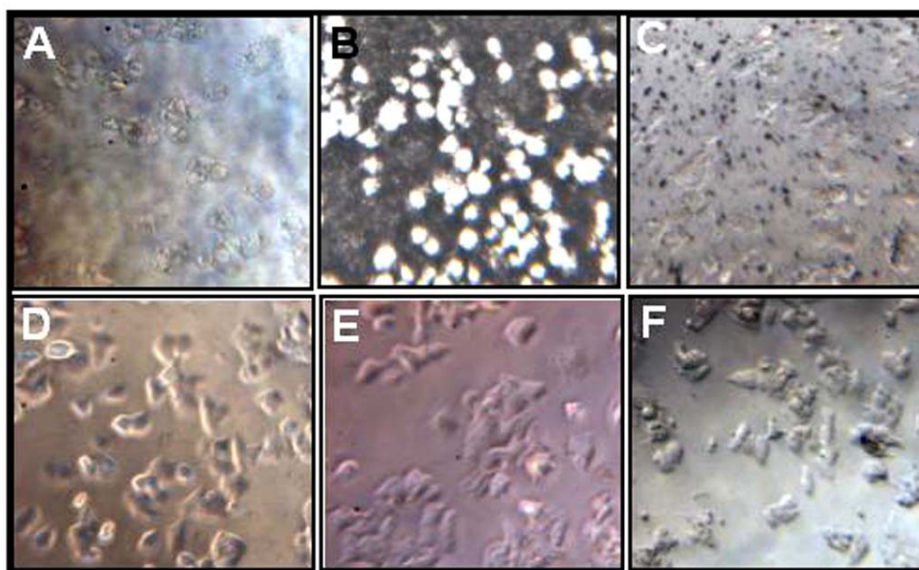

**ESI 8:** Optical microscope images of HepG2 cells (B to F) incubated respectively with 130 µg/mL, 13 µg/mL, 1.3 µg/mL, 0.13 µg/mL and 0.0001 µg/mL of OA-SL-AgNPs. Figure A shows the morphology of untreated (control) HepG2 cells incubated for 3 h.



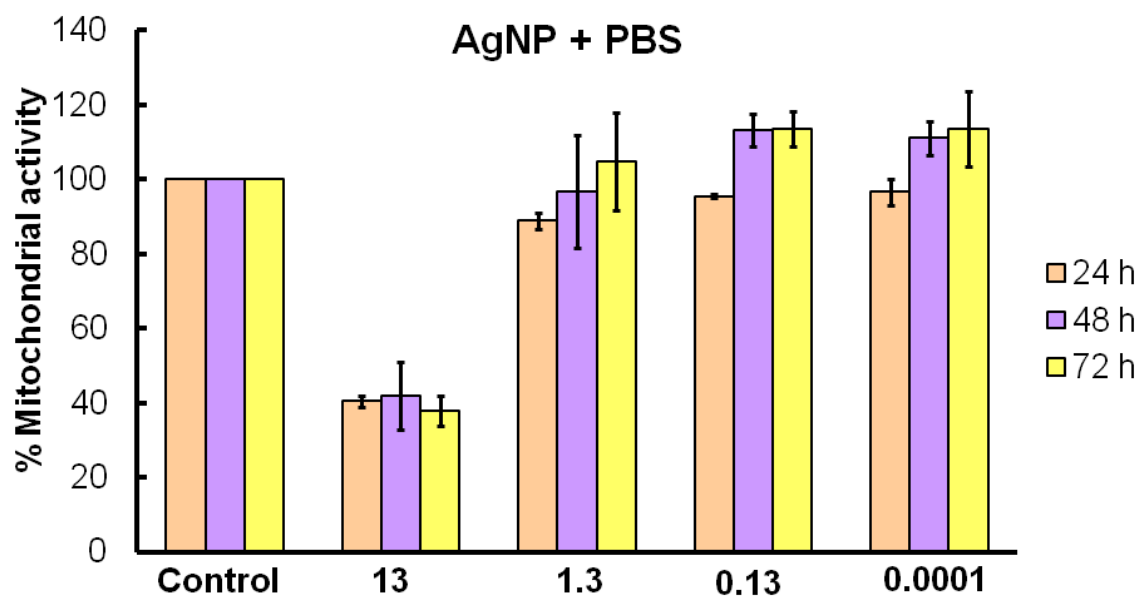

**ESI-9:** Statistical data representing the toxic effect of OA-SL-AgNPs dispersed in PBS and incubated with HepG2 cells for 24, 48 and 72 h.

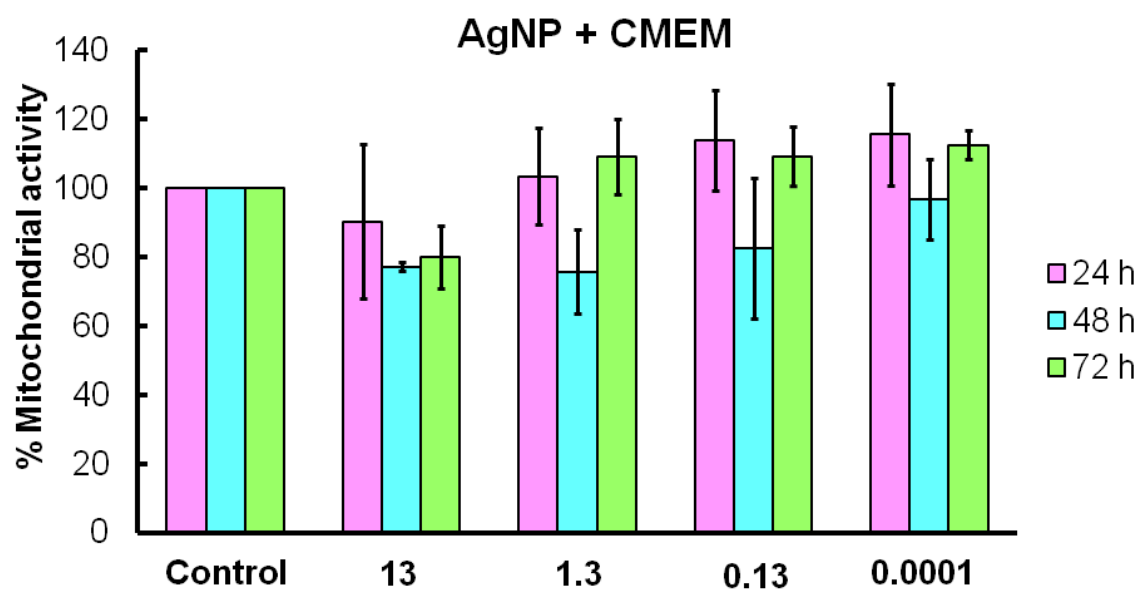

**ESI-10:** Statistical data representing the toxic effect of OA-SL-AgNPs dispersed in CMEM and incubated with HepG2 cells for 24, 48 and 72 h.

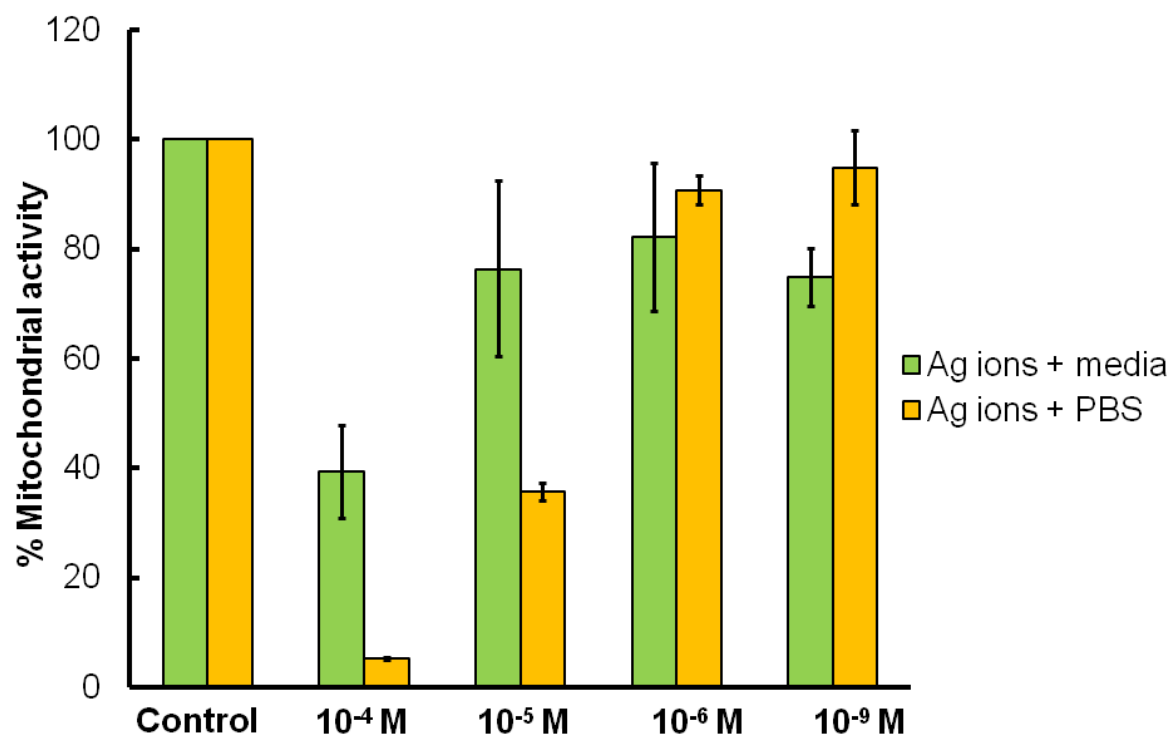

**ESI-11:** Statistical data representing the toxic effect of Ag<sup>+</sup> ions incubated with HepG2 cells for 24 h in the presence of serum containing media and PBS.

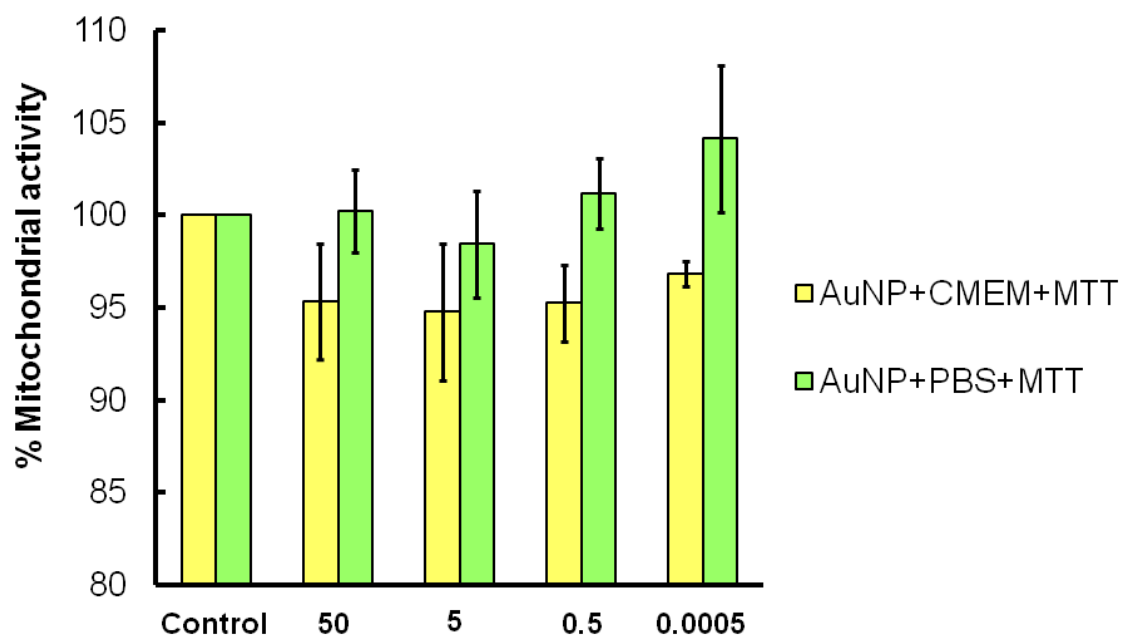

**ESI-12:** Statistical data representing the interactions of AuNPs with MTT dye incubated for 24 h in the presence of CMEM and PBS.

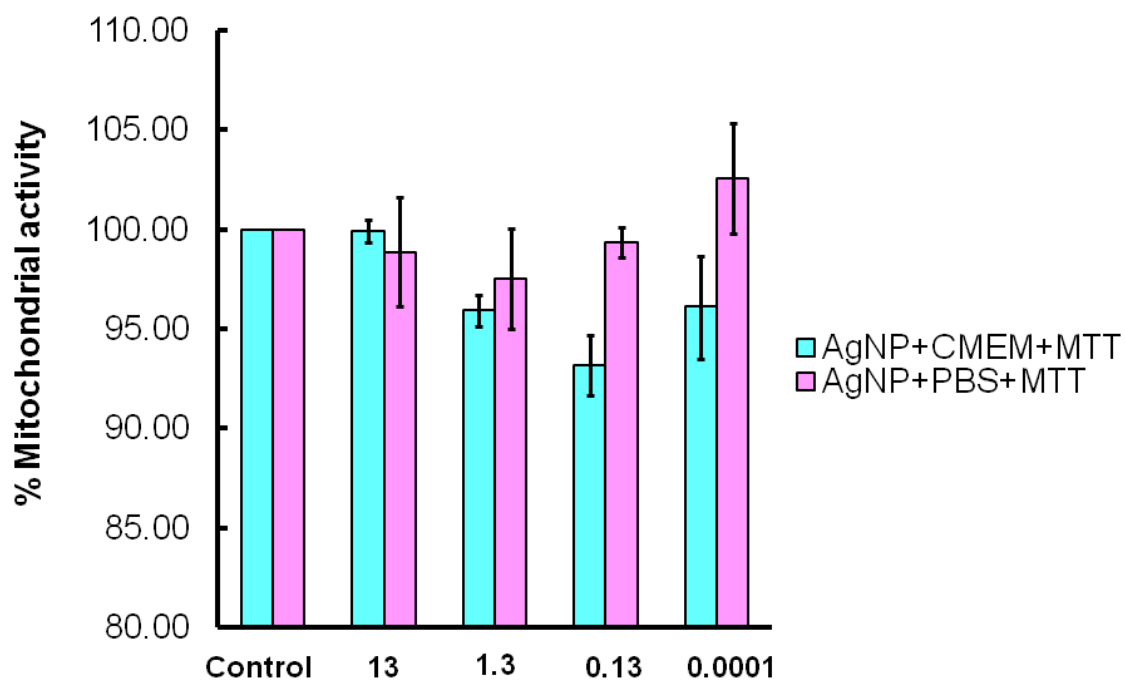

**ESI-13:** Statistical data representing the interactions of AuNPs with MTT dye incubated for 24 h in the presence of CMEM and PBS.

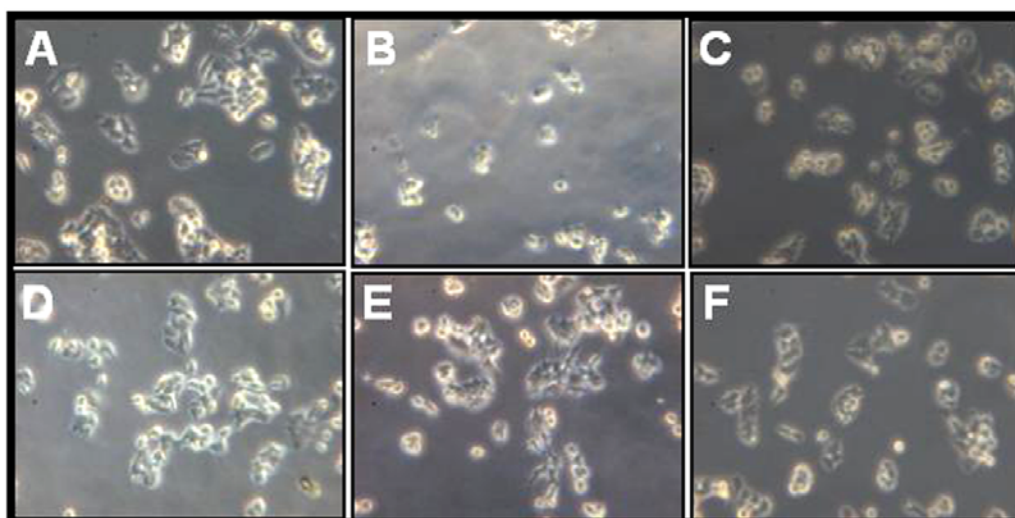

**ESI 14:** Optical microscope images of HepG2 cells (B to F) incubated respectively with 600 µg/mL, 60 µg/mL, 6 µg/mL, 0.6 µg/mL and 0.0006 µg/mL of OA-SL molecules. Figure A shows the morphology of untreated (control) HepG2 cells incubated for 3 h.
